# Supplementary material for: Dispersive bands of bound states in the continuum
Source: publisher site journal article supplement (doi:10.1515/nanoph-2021-0260), 2021-07-13
Supplement: Supplementary file 1 [file j_nanoph-2021-0260_suppl.pdf]

# Dispersive bands of bound states in the continuum: supplementary material

The supplementary material contains technical details concerning (i) The effective non-Hermitian description of indirect resonator coupling; (ii) Band dispersion curve of the BIC crystal; (iii) Friedrichs-Lee Hamiltonian of the exactly-solvable optical cavities-CROW system.

## 1. EFFECTIVE NON-HERMITIAN DESCRIPTION OF INDIRECT RESONATOR COUPLING

To derive an effective non-Hermitian description of indirect resonator coupling, we follow a rather standard procedure which is outlined, for example, in Refs. [1–3]. The starting point is provided by the exact coupled-mode equations (Eqs.(8) and (9) of the main manuscript)

$$i \frac{da_n}{dt} = \int dk G_n(k) c(k, t) \quad (S1)$$

$$i \frac{\partial c}{\partial t} = \{\omega(k) - \omega_0\} c(k, t) + \sum_n G_n^*(k) a_n(t) \quad (S2)$$

Equation (S2) can be formally integrated with the initial condition  $c(k, 0) = 0$ , yielding

$$c(k, t) = -i \sum_n G_n^*(k) \int_0^t d\tau a_n(\tau) \exp \{-i[\omega(k) - \omega_0](t - \tau)\} \quad (S3)$$

Substitution of Eq.(S3) into Eq.(S1) yields the following set of integro-differential equations for the field amplitudes  $a_n(t)$

$$i \frac{da_n}{dt} = \sum_l \int_0^t d\tau a_l(t - \tau) \mathcal{G}_{n,l}(\tau) \quad (S4)$$

where

$$\mathcal{G}_{n,l}(\tau) \equiv -i \int dk G_n(k) G_l^*(k) \exp \{-i[\omega(k) - \omega_0]\tau\} \quad (S5)$$

are the memory functions. Note that  $\mathcal{G}_{n,l}(\tau)$  vanishes for long memory time  $\tau$ , i.e.  $\mathcal{G}_{n,l}(\tau) \rightarrow 0$  as  $\tau \rightarrow \infty$ , with some characteristic time  $\tau_{n,l}$  which provides the typical memory time of the indirect coupling between resonators  $n$  and  $l$ . In the weak coupling (Markovian) limit, the change of the amplitudes  $a_n(t)$  over the time scale of the memory times is small, so that Eq.(S4) can be approximated by the set of differential equations

$$i \frac{da_n}{dt} \simeq \sum_l H_{n,l} a_l(t) \quad (S6)$$

where we have set

$$H_{n,l} \equiv \int_0^\infty d\tau \mathcal{G}_{n,l}(\tau) = -i \int_0^\infty d\tau \int dk G_n(k) G_l^*(k) \exp \{-i[\omega(k) - \omega_0]\tau\} \quad (S7)$$

Note that  $H_{n,l}$  can be written as

$$\begin{aligned} H_{n,l} &= -i \lim_{\epsilon \rightarrow 0^+} \int_0^\infty d\tau \int dk G_n(k) G_l^*(k) \exp \{-i[\omega(k) - \omega_0]\tau - \epsilon\tau\} \\ &= -i \int dk G_n(k) G_l^*(k) \lim_{\epsilon \rightarrow 0^+} \int_0^\infty \exp \{-i[\omega(k) - \omega_0]\tau - \epsilon\tau\} d\tau = \lim_{\epsilon \rightarrow 0^+} \int dk \frac{G_n(k) G_l^*(k)}{i\epsilon + \omega_0 - \omega(k)} \end{aligned} \quad (S8)$$

which is Eq.(11) given in the main text. In order to discuss some main properties of the coefficients  $H_{n,l}$ , let us consider a system with discrete translational invariance, so that  $G_n(k) = G_0(k) \exp(ikdn)$  and  $H_{n,l}$  is a function of  $(n - l)$  solely, i.e.  $H_{n,l} = H_{n-l}$  with

$$H_n = \lim_{\epsilon \rightarrow 0^+} \int dk \frac{|G_0(k)|^2 \exp(ikdn)}{i\epsilon + \omega_0 - \omega(k)}. \quad (S9)$$

In a typical situation where the coupling of the resonator mode with the forward and backward propagating waves in the waveguide is symmetric, one has  $G_0(-k) = G_0(k)$ , so that from Eq.(S9) it readily follows that

$$H_{-n} = H_n. \quad (\text{S10})$$

Assuming that the resonance condition  $\omega(k) = \omega_0$  is satisfied at the wave numbers  $k = \pm k_0$ , the main contribution to the integral on the right hand sides of Eq.(S9) is obtained when  $k$  varies in the neighborhood of  $\pm k_0$ . Therefore, after setting  $\omega(k) \simeq v_g |k|$  for  $k \sim \pm k_0$ , where  $v_g$  is the group velocity of the propagating fields in the waveguide at the frequency  $\omega_0$ , taking into account the identity

$$\lim_{\epsilon \rightarrow 0^+} \frac{1}{i\epsilon + x} = \mathcal{P} \left( \frac{1}{x} \right) - i\pi\delta(x), \quad (\text{S11})$$

where  $\mathcal{P}$  denotes the principal value, from Eq.(S9) one obtains

$$H_n = -\frac{2\pi i |G_0(k_0)|^2 \cos(k_0 n d)}{v_g} + \frac{1}{v_g} \mathcal{P} \int dk \left( \frac{1}{k + k_0} - \frac{1}{k - k_0} \right) |G_0(k)|^2 \exp(iknd). \quad (\text{S12})$$

From Eq.(S12) it readily follows that  $H_n$  vanishes as  $n \rightarrow \pm\infty$  if and only if

$$G_0(k_0) = 0. \quad (\text{S13})$$

Equation (S13) also corresponds to a real value of  $H_0$ , i.e. to the vanishing of the decay rate for the coupling of a single resonator into the waveguide. The condition (S13), which ensures that the coupling  $H_n$  vanishes as  $n \rightarrow \pm\infty$ , is equivalent the existence of a BIC when a *single resonator* is side-coupled to the waveguide.

## 2. BAND DISPERSION CURVE OF THE BIC CRYSTAL

In a system with discrete translational invariance,  $H_{n,l} = H_{n-l}$ . Therefore, in the  $N \rightarrow \infty$  limit the solutions to the coupled-mode equations (S6) of reduced non-Hermitian dynamics are of Bloch-Floquet form. By letting  $a_n(t) = \exp[iqdn - i\Omega(q)t]$ , where  $-\pi/d \leq q < \pi/d$  is the Bloch wave number, the energy dispersion relation  $\Omega(q)$  reads

$$\Omega(q) = \sum_l H_l \exp(-iqdl) \quad (\text{S14})$$

where  $H_l$  is given by Eq.(S9). Substitution of Eq.(S9) into Eq.(S14) and using the identity

$$\sum_{l=-\infty}^{\infty} \exp(ilx) = 2\pi \sum_l \delta(x - 2\pi l) \quad (\text{S15})$$

one obtains

$$\Omega(q) = \frac{2\pi}{d} \lim_{\epsilon \rightarrow 0^+} \sum_{l=-\infty}^{\infty} \frac{|G_0(q + 2\pi l/d)|^2}{i\epsilon + \omega_0 - \omega(q + 2\pi l/d)}. \quad (\text{S16})$$

Clearly, since  $\omega_0$  is embedded in the continuous spectrum  $\omega(k)$  of the waveguide modes, for  $q$  and  $l$  such that  $q + 2\pi l/d = \pm k_0$ , so as  $\omega(\pm k_0) = \omega_0$ , the corresponding term in the series on the right hand side of Eq.(S16) diverges in the  $\epsilon \rightarrow 0^+$  limit, unless  $G(\pm k_0) = 0$ . As discussed above, this condition corresponds to the vanishing of  $H_n$  as  $|n| \rightarrow \infty$  and to the existence of a BIC mode when a *single resonator* is coupled to the waveguide. In this case  $\Omega(q)$  is non-singular for any value of Bloch wave number  $q$  and the dispersion curve reads

$$\Omega(q) = \frac{2\pi}{d} \sum_{l=-\infty}^{\infty} \frac{|G_0(q + 2\pi l/d)|^2}{\omega_0 - \omega(q + 2\pi l/d)} \quad (\text{S17})$$

which is Eq.(16) given in the main manuscript. Conversely, if  $G_0(\pm k_0) \neq 0$ , i.e. when a single resonator coupled to the waveguide does not sustain a BIC mode and decay into the waveguide modes is allowed,  $\Omega(q)$  converges to a real value for  $q + 2\pi l/d \neq \pm k_0$ , but displays a diverging behavior (with non-vanishing real and imaginary parts) for  $q$  near  $q + 2\pi l/d \simeq \pm k_0$ . Such a divergence stems from the fact that, when  $G_0(\pm k_0) \neq 0$ , the hopping amplitude  $H_n$  does not vanish as  $n \rightarrow \pm\infty$ , so as the  $N \rightarrow \infty$  limit cannot be assumed within the asymptotic analysis based on the non-Hermitian effective Hamiltonian dynamics.

### 3. FRIEDRICHS-LEE HAMILTONIAN OF THE CAVITIES-CROW SYSTEM

Let us consider the optical structure of Fig.1B of the main manuscript, comprising a CROW and an array of side-coupled optical cavities with three contact points. Indicating by  $\hat{a}_n^\dagger$  and  $\hat{b}_n^\dagger$  the creation operators of photons in the optical modes of the  $n$ -th cavity and in the  $n$ -th resonator of the CROW, the full Hamiltonian of the photon field reads  $\hat{H} = \hat{H}_s + \hat{H}_c + \hat{H}_i$ , where

$$\hat{H}_s = \sum_n \omega_0 \hat{a}_n^\dagger \hat{a}_n \quad (\text{S18})$$

is the Hamiltonian of uncoupled optical cavities,

$$\hat{H}_c = \sum_n J(\hat{b}_n^\dagger \hat{b}_{n+1} + \text{H.c.}) \quad (\text{S19})$$

is the tight-binding Hamiltonian of the CROW, and

$$\hat{H}_i = \sum_n \left\{ \rho \hat{a}_n^\dagger \hat{b}_n + \rho h \hat{a}_n^\dagger (\hat{b}_{n+1} + \hat{b}_{n-1}) + \text{H.c.} \right\} \quad (\text{S20})$$

describes the coupling between the resonators in the CROW and the optical cavities. The full Hamiltonian  $\hat{H}$  can be cast in the Friedrichs-Lee form [Eqs.(1-4) of the main text] after switching from the Wannier basis to the Bloch basis representations of the modes in the CROW. To this aim, let us introduce the destruction operators  $\hat{c}(k)$  of Bloch photon modes in the CROW, with Bloch wave number  $k$  ( $-\pi \leq k < \pi$ ), via the transformation

$$\hat{c}(k) = \frac{1}{\sqrt{2\pi}} \sum_n \hat{b}_n \exp(-ikn), \quad (\text{S21})$$

i.e.

$$\hat{b}_n = \frac{1}{\sqrt{2\pi}} \int_{-\pi}^{\pi} dk \hat{c}(k) \exp(ikn). \quad (\text{S22})$$

Note that, since  $[\hat{b}_n, \hat{b}_m^\dagger] = \delta_{n,m}$  in the Wannier basis, one has  $[\hat{c}(k), \hat{c}^\dagger(k')] = \delta(k - k')$  in Bloch basis. Substitution of Eq.(S22) into Eqs.(S19) and (S20) yields

$$\hat{H}_c = \int_{-\pi}^{\pi} dk \omega(k) \hat{c}^\dagger(k) \hat{c}(k) \quad (\text{S23})$$

and

$$\hat{H}_i = \sum_n \int_{-\pi}^{\pi} dk \left\{ G_n(k) \hat{a}_n^\dagger \hat{c}(k) + \text{H.c.} \right\} \quad (\text{S24})$$

where

$$\omega(k) = 2J \cos k \quad (\text{S25})$$

is the dispersion relation of the tight-binding CROW band, and

$$G_n(k) = \frac{\rho}{\sqrt{2\pi}} (1 + 2h \cos k) \exp(ikn) \quad (\text{S26})$$

is the spectral coupling function.

### REFERENCES

1. P.L. Knight, M.A. Lauder and B.J. Dalton, Laser-induced continuum structure, *Phys. Rep.* **190** (1990), 1-61.
2. S. Longhi, Transfer of light waves in optical waveguides via a continuum, *Phys. Rev. A* **78** (2008), 013815.
3. S. Longhi, Quantum decay in a topological continuum, *Phys. Rev. A* **100** (2019), 022123.
